# Supplementary material for: Chemical and Nutritional Profiling of the Seaweed Dictyota dichotoma and Evaluation of Its Antioxidant, Antimicrobial and Hypoglycemic Potentials
Source: MDPI journal article supplement (doi:10.3390/md21050273), 2023-04-27
Supplement: s1 [file s1]

**Figure S2.** GC-MS spectrum of *n*-butanol extract of *D. dichotoma*.

**Table S1.** Antimicrobial activity of *D. dichotoma* extracts.

| Extracts                      | Dose mg/ml | Inhibition zone diameter (mm) |                         |                         |                         |                         |
|-------------------------------|------------|-------------------------------|-------------------------|-------------------------|-------------------------|-------------------------|
|                               |            | <i>E. coli</i>                | <i>P. aeruginosa</i>    | <i>S. aureus</i>        | <i>B. subtilis</i>      | <i>C. albicans</i>      |
| Azithromycin,<br>amphotericin | Control    | 36.33±0.58                    | 38.00±1.00              | 32.67±1.53              | 27.67±1.53              | 23.00±1.00              |
|                               | 100mg/ml   | 16.33±1.53 <sup>c</sup>       | 13.33±0.58 <sup>c</sup> | 15.33±0.58 <sup>c</sup> | 14.00±1.00 <sup>c</sup> | 12.67±2.08 <sup>a</sup> |
| Ethyl acetate                 | 50mg/ml    | 15.00±1.00 <sup>c</sup>       | 9.00±7.81 <sup>c</sup>  | 14.00±1.00 <sup>c</sup> | 12.67±0.58 <sup>c</sup> | 11.67±0.58 <sup>a</sup> |
|                               | 25mg/ml    | 14.00±1.00 <sup>c</sup>       | 8.33±7.23 <sup>c</sup>  | 13.67±1.53 <sup>c</sup> | 12.67±0.58 <sup>c</sup> | 10.67±0.58 <sup>a</sup> |
|                               | 12.5mg/ml  | 14.00±1.00 <sup>c</sup>       | 7.67±6.66 <sup>c</sup>  | 13.33±1.53 <sup>c</sup> | 8.33±7.23 <sup>c</sup>  | 7.00±6.08 <sup>a</sup>  |
| <i>n</i> -butanol             | 100mg/ml   | 16.00±1.73 <sup>c</sup>       | 15.00±0.00 <sup>c</sup> | 12.00±0.00 <sup>c</sup> | 15.33±1.53 <sup>c</sup> | 17.33±2.08 <sup>b</sup> |
|                               | 50mg/ml    | 15.67±1.15 <sup>c</sup>       | 13.33±0.58 <sup>c</sup> | 10.67±0.58 <sup>c</sup> | 13.67±1.15 <sup>c</sup> | 16.33±2.52 <sup>b</sup> |
|                               | 25mg/ml    | 14.67±1.53 <sup>c</sup>       | 9.00±7.81 <sup>c</sup>  | 07.33±6.35 <sup>c</sup> | 13.33±0.58 <sup>c</sup> | 15.33±2.52 <sup>c</sup> |
|                               | 12.5mg/ml  | 13.67±0.58 <sup>c</sup>       | 0.00±0.00 <sup>c</sup>  | 6.33±5.51 <sup>c</sup>  | 12.33±0.58 <sup>c</sup> | 15.00±3.00 <sup>c</sup> |

**a)** significantly different at  $\alpha < 0.001$ , 0.01 and 0.05; **b)** significantly different at  $\alpha < 0.01$ ; **c)** significantly different at  $\alpha < 0.05$ . Each value was recorded as mean and standard deviation from 3 replicates.
